# Supplementary material
Source: PubMed Central journal article supplement (PMC3012593)
Supplement: blood-2010-05-286534_1.pdf [file blood-2010-05-286534_1.pdf]

**Table S1. List of selected candidate genes in the linked interval**

| <b>GENE No</b> | <b>GENE Symbol</b>           |
|----------------|------------------------------|
| 1              | <i>ZBTB47</i>                |
| 2              | <i>KBTBD5</i>                |
| 3              | <i>HHATL</i>                 |
| 4              | <i>CCDC13</i>                |
| 5              | <i>HIGD1A</i>                |
| 6              | <i>CCBP2</i>                 |
| 7              | <i>CYP8B1</i>                |
| 8              | <i>C3orf39</i>               |
| 9              | <i>SNRK</i>                  |
| 10             | <i>ANO10</i> <sup>†</sup>    |
| 11             | <i>ABHD5</i> <sup>†</sup>    |
| 12             | <i>C3orf23</i> <sup>†</sup>  |
| 13             | <i>ZNF445</i> <sup>*</sup>   |
| 14             | <i>BC014381</i> <sup>†</sup> |
| 15             | <i>ZNF167</i>                |
| 16             | <i>ZNF660</i> <sup>*</sup>   |
| 17             | <i>ZNF197</i>                |
| 18             | <i>ZNF35</i> <sup>†</sup>    |
| 19             | <i>ZNF502</i> <sup>†</sup>   |
| 20             | <i>ZNF501</i> <sup>†</sup>   |
| 21             | <i>KIAA1143</i> <sup>†</sup> |
| 22             | <i>KIF15</i>                 |
| 23             | <i>TMEM42</i> <sup>†</sup>   |
| 24             | <i>TGM4</i> <sup>†</sup>     |
| 25             | <i>ZDHHC3</i>                |
| 26             | <i>EXOSC7</i> <sup>†</sup>   |
| 27             | <i>CLEC3B</i> <sup>*</sup>   |
| 28             | <i>CDCP1</i> <sup>†</sup>    |
| 29             | <i>TMEM158</i>               |
| 30             | <i>LARS2</i>                 |
| 31             | <i>LIMD1</i> <sup>†</sup>    |
| 32             | <i>SACM1L</i>                |
| 33             | <i>SLC6A20</i> <sup>†</sup>  |
| 34             | <i>LZTFL1</i> <sup>†</sup>   |
| 35             | <i>CCR9</i> <sup>*</sup>     |
| 36             | <i>FYCO1</i> <sup>†</sup>    |
| 37             | <i>XCR1</i> <sup>*</sup>     |
| 38             | <i>CCR1</i> <sup>*</sup>     |
| 39             | <i>CCR3</i>                  |
| 40             | <i>CCR2</i>                  |
| 41             | <i>CCR5</i>                  |

|    |                      |
|----|----------------------|
| 42 | CCRL2                |
| 43 | LTF                  |
| 44 | RTP3*                |
| 45 | LRRC2*               |
| 46 | TDGF1*               |
| 47 | ALS2CL               |
| 48 | TMIE <sup>†</sup>    |
| 49 | TSP50                |
| 50 | TESSP5*              |
| 51 | TESSP2*              |
| 52 | MYL3*                |
| 53 | PTH1R                |
| 54 | CCDC12 <sup>†</sup>  |
| 55 | NBEAL2               |
| 56 | SETD2                |
| 57 | KIF9                 |
| 58 | KLHL18               |
| 59 | PTPN23               |
| 60 | SCAP                 |
| 61 | C3orf75 <sup>†</sup> |
| 62 | CSPG5                |
| 63 | SMARCC1              |
| 64 | DHX30                |
| 65 | MAP4                 |
| 66 | CDC25A               |
| 67 | CAMP                 |
| 68 | ZNF589               |
| 69 | NME6                 |
| 70 | SPINK8               |
| 71 | FBXW12               |
| 72 | PLXNB1               |
| 73 | CCDC51 <sup>†</sup>  |
| 74 | CCDC72*              |
| 75 | ATRIP                |
| 76 | TREX1*               |
| 77 | SHISA5               |
| 78 | PFKFB4*              |
| 79 | UCN2*                |
| 80 | COL7A1               |
| 81 | UQCRC1               |
| 82 | TMEM89*              |
| 83 | CELSR3               |
| 84 | SLC26A6              |
| 85 | CELSR3               |
| 86 | NCKIPSD <sup>†</sup> |
| 87 | IP6K2 <sup>†</sup>   |
| 88 | PRKAR2A              |

|     |                              |
|-----|------------------------------|
| 89  | <i>SLC25A20</i> <sup>†</sup> |
| 90  | <i>ARIH2</i>                 |
| 91  | <i>P4HTM</i> <sup>†</sup>    |
| 92  | <i>WDR6</i> *                |
| 93  | <i>DALRD3</i> *              |
| 94  | <i>NDUFAF3</i>               |
| 95  | <i>IMPDH2</i>                |
| 96  | <i>QRICH1</i>                |
| 97  | <i>QARS</i>                  |
| 98  | <i>USP19</i>                 |
| 99  | <i>LAMB2</i> <sup>†</sup>    |
| 100 | <i>CCDC71</i>                |
| 101 | <i>KLHDC8B</i> *             |
| 102 | <i>LOC646498</i>             |
| 103 | <i>CCDC36</i>                |
| 104 | <i>C3orf62</i>               |
| 105 | <i>USP4</i>                  |
| 106 | <i>GPX1</i> <sup>†</sup>     |
| 107 | <i>RHOA</i>                  |
| 108 | <i>TCTA</i> *                |
| 109 | <i>AMT</i>                   |
| 110 | <i>NICN1</i>                 |
| 111 | <i>DAG1</i> *                |
| 112 | <i>BSN</i>                   |
| 113 | <i>APEH</i>                  |
| 114 | <i>MST1</i> *                |
| 115 | <i>RNF123</i>                |
| 116 | <i>GMPPB</i> *               |
| 117 | <i>IP6K1</i> <sup>†</sup>    |
| 118 | <i>CDH29</i>                 |
| 119 | <i>C3orf54</i> <sup>†</sup>  |
| 120 | <i>UBA7</i> <sup>†</sup>     |
| 121 | <i>TRAIP</i>                 |
| 122 | <i>CAMKV</i>                 |
| 123 | <i>MST1R</i> *               |
| 124 | <i>MON1A</i> *               |
| 125 | <i>RBM6</i>                  |
| 126 | <i>RBM5</i>                  |
| 127 | <i>SEMA3F</i>                |
| 128 | <i>GNAT1</i>                 |
| 129 | <i>SLC38A3</i>               |
| 130 | <i>GNAI2</i>                 |
| 131 | <i>SEMA3B</i>                |
| 132 | <i>C3orf45</i> *             |
| 133 | <i>IFRD2</i>                 |
| 134 | <i>HYAL3</i> <sup>†</sup>    |
| 135 | <i>HYAL1</i>                 |

|     |                   |
|-----|-------------------|
| 136 | <i>HYAL2</i> *    |
| 137 | <i>TUSC2</i> †    |
| 138 | <i>RASSF1</i>     |
| 139 | <i>ZMYND10</i>    |
| 140 | <i>TUSC4</i> *    |
| 141 | <i>CYB561D2</i> † |
| 142 | <i>TMEM115</i> *  |
| 143 | <i>CACNA2D2</i>   |
| 144 | <i>C3orf18</i> †  |
| 145 | <i>HEMK1</i>      |
| 146 | <i>CISH</i>       |
| 147 | <i>MAPKAPK3</i>   |
| 148 | <i>DOCK3</i>      |
| 149 | <i>ARMET</i> †    |
| 150 | <i>RBM15B</i>     |
| 151 | <i>VPRBP</i> †    |
| 152 | <i>RAD54L2</i> †  |
| 153 | <i>TEX264</i> †   |
| 154 | <i>GRM2</i> *     |
| 155 | <i>IQCF3</i>      |
| 156 | <i>IQCF2</i> *    |
| 157 | <i>IQCF1</i> *    |
| 158 | <i>RRP9</i> *     |
| 159 | <i>PARP3</i> *    |
| 160 | <i>GPR62</i>      |
| 161 | <i>PCBP4</i> *    |
| 162 | <i>ABHD14B</i>    |
| 163 | <i>ABHD14A</i>    |
| 164 | <i>ACY1</i> †     |
| 165 | <i>RPL29</i> *    |

\*All exons sequenced; †All but 1 exon sequenced.

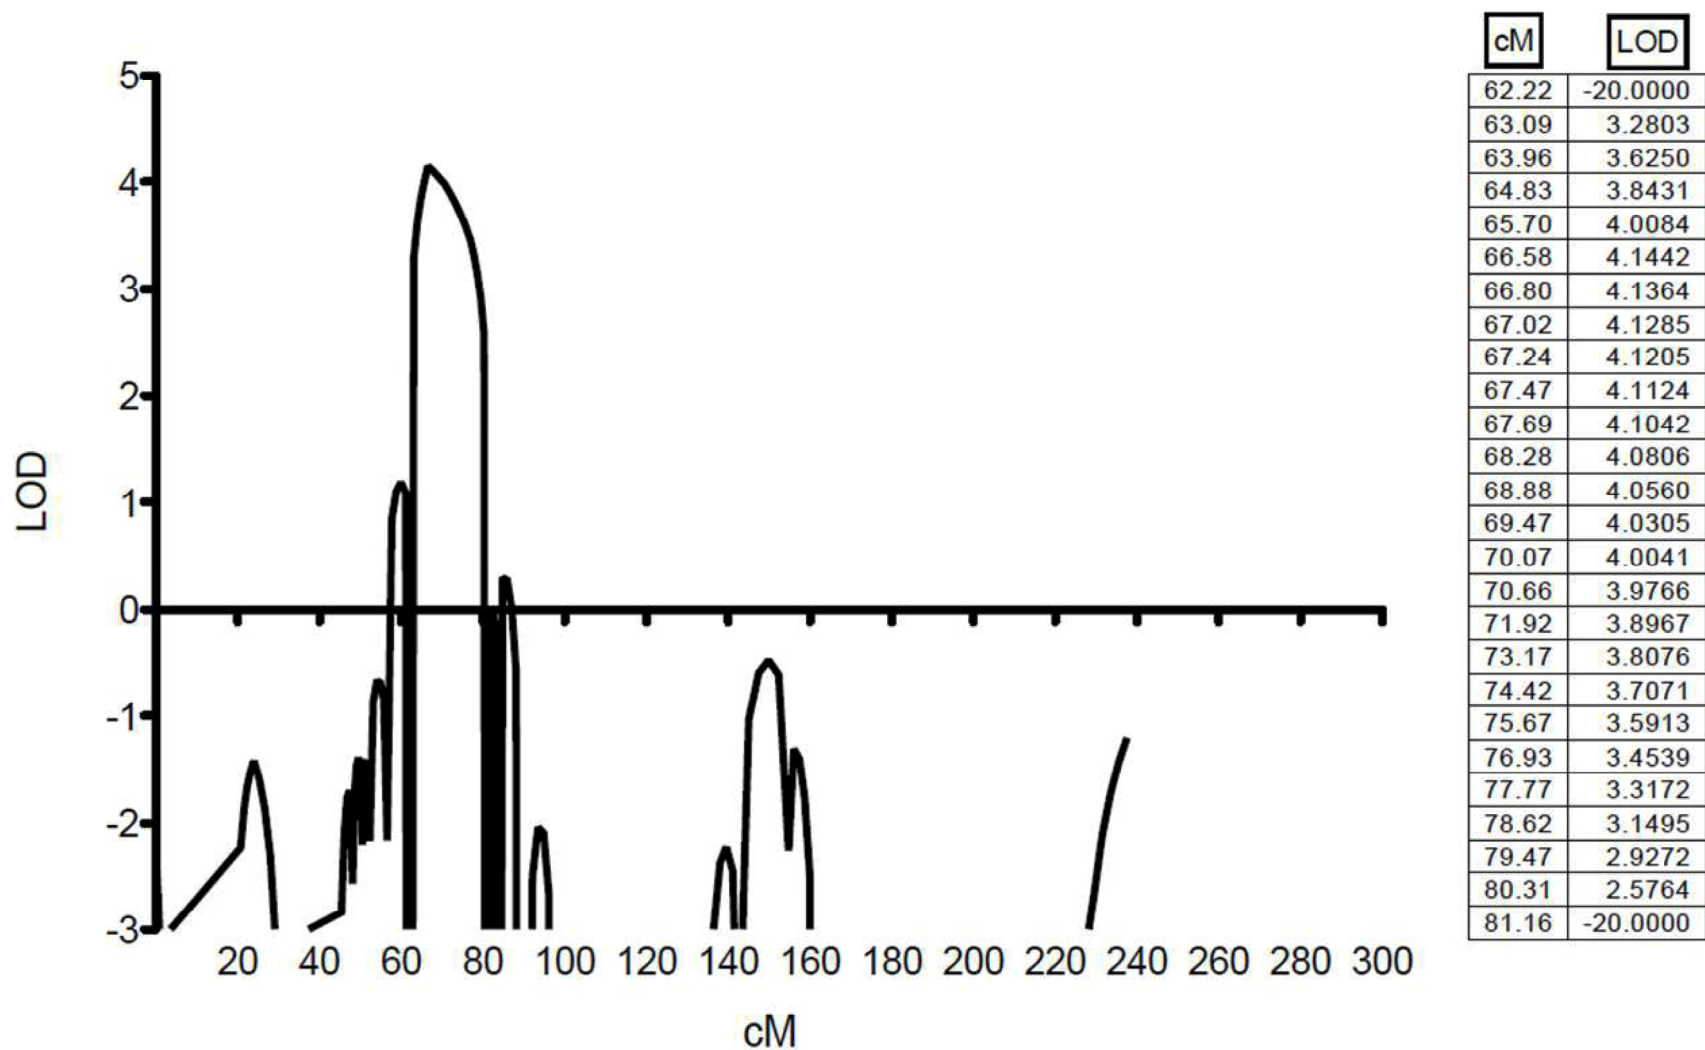

**Figure S1. Homozygosity mapping of 2 consanguineous families with 2 affected siblings in each (Fig. 1, families 4, 5) provided significant linkage (LOD = 4.14) to identify the region of interest between the coordinates ~62-80 cM, located between the microsatellite markers D3S1612 and D3S3532**
